# Supplementary material for: New crystalline 1D/2D/3D indium selenides directed by piperidine and auxiliary solvents
Source: Royal Society of Chemistry journal article supplement (doi:10.1039/d2dt00174h), 2022-01-01
Supplement: d2dt00174h1.pdf [file d2dt00174h1.pdf]

*Supporting Information for*

**New Crystalline 1D/2D/3D Indium Selenides Directed by Piperidine  
and Auxiliary Solvents**

Chaozhuang Xue,<sup>\*a</sup> Jian Lin,<sup>b</sup> Yifan Zhang,<sup>a</sup> Zhiyang Liu,<sup>a</sup> Rui Li,<sup>a</sup> Shuwen Gong,<sup>\*a</sup> and  
Konggang Qu<sup>\*a</sup>

<sup>a</sup> School of Chemistry and Chemical Engineering, Liaocheng University, Liaocheng 252059,  
China.

<sup>b</sup> School of Materials Science and Engineering, Suzhou University of Science and Technology,  
Suzhou 215009, China.

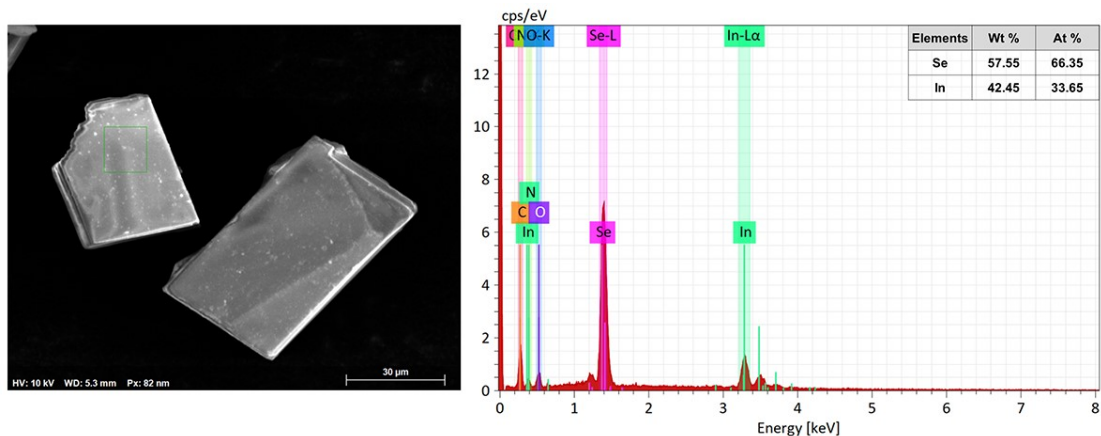

Fig. S1 SEM image and energy dispersive spectroscopy (EDS) of ISP-1.

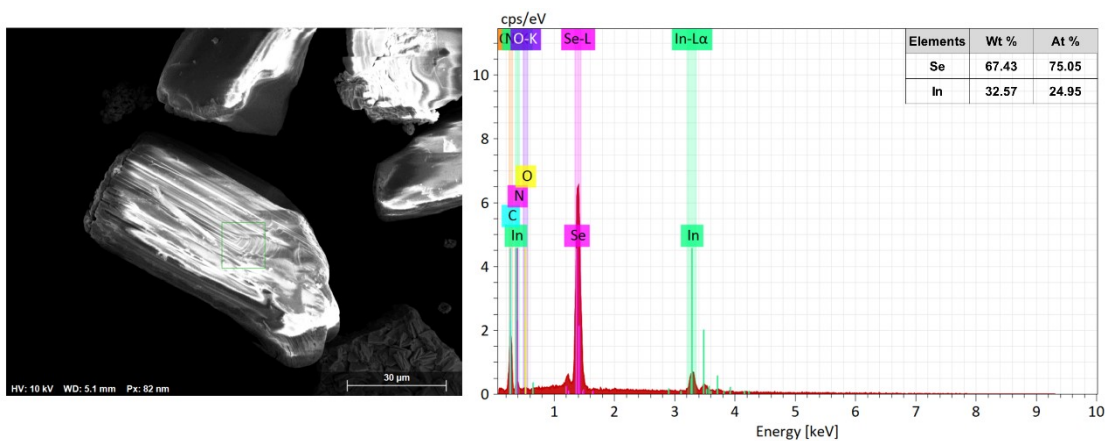

Fig. S2 SEM image and energy dispersive spectroscopy (EDS) of ISP-2.

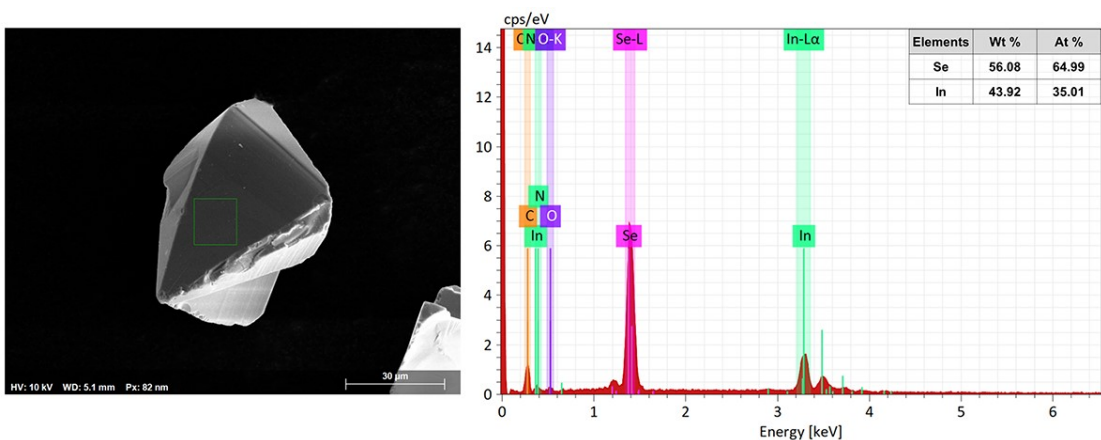

Fig. S3 SEM image and energy dispersive spectroscopy (EDS) of ISP-3.

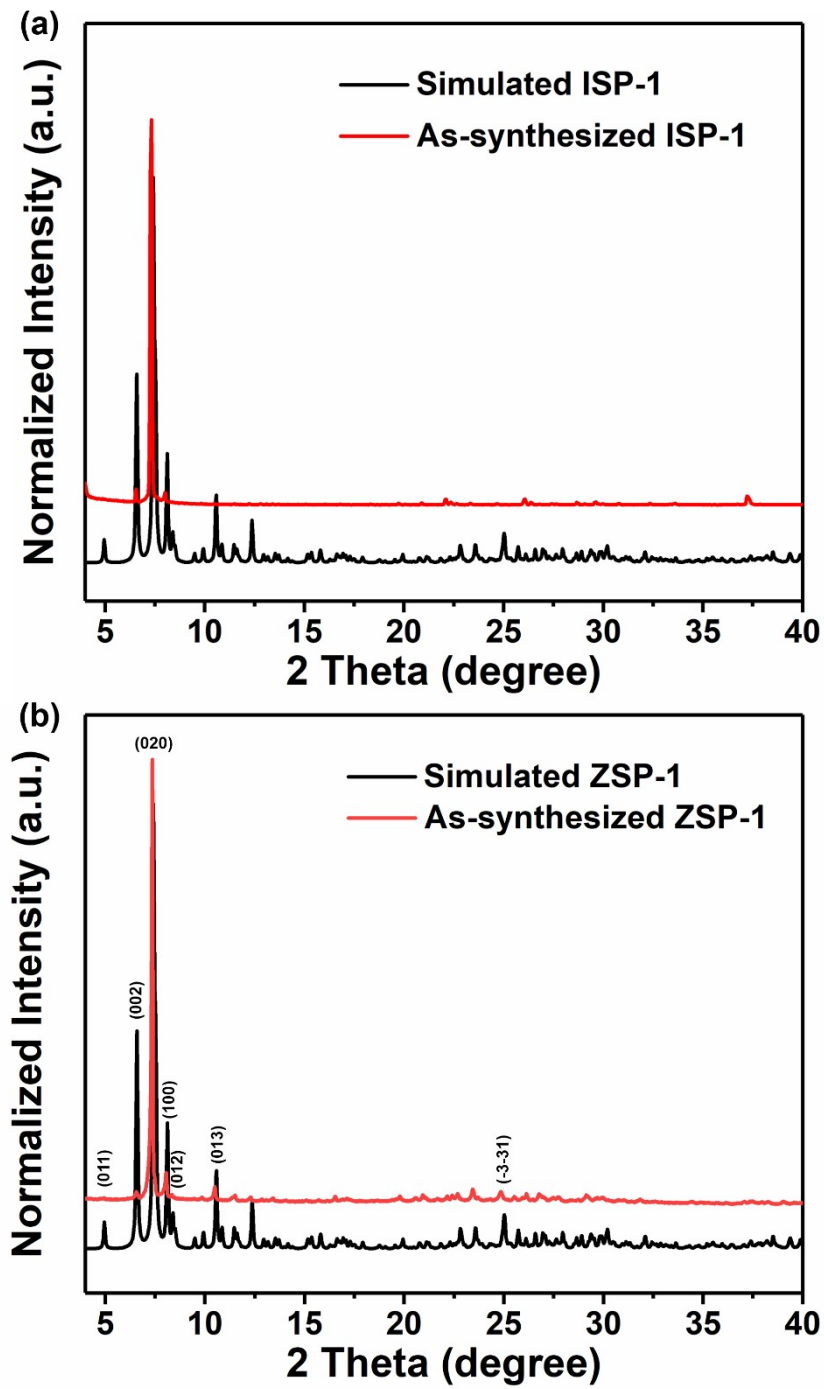

Fig. S4 Powder X-ray diffraction (PXRD) patterns of unground ISP-1(a) and grinded ISP-1 (b).

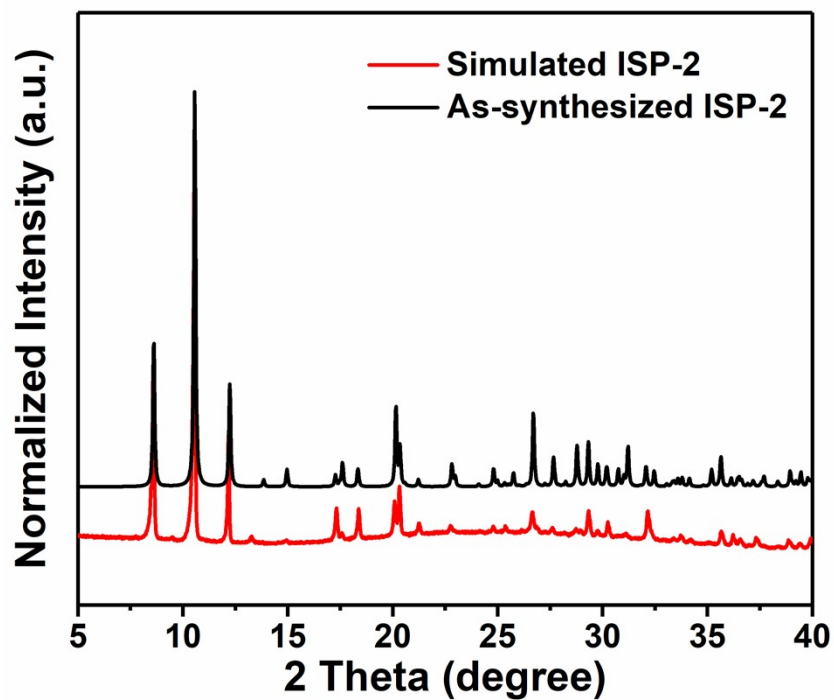

Fig. S5 Powder X-ray diffraction (PXRD) patterns of ISP-2.

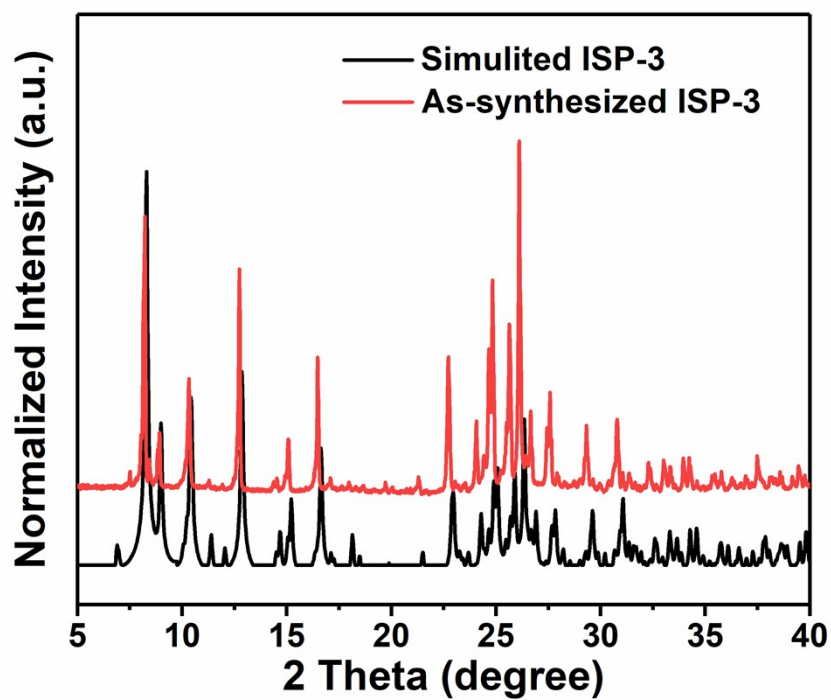

Fig. S6 Powder X-ray diffraction (PXRD) patterns of ISP-3.

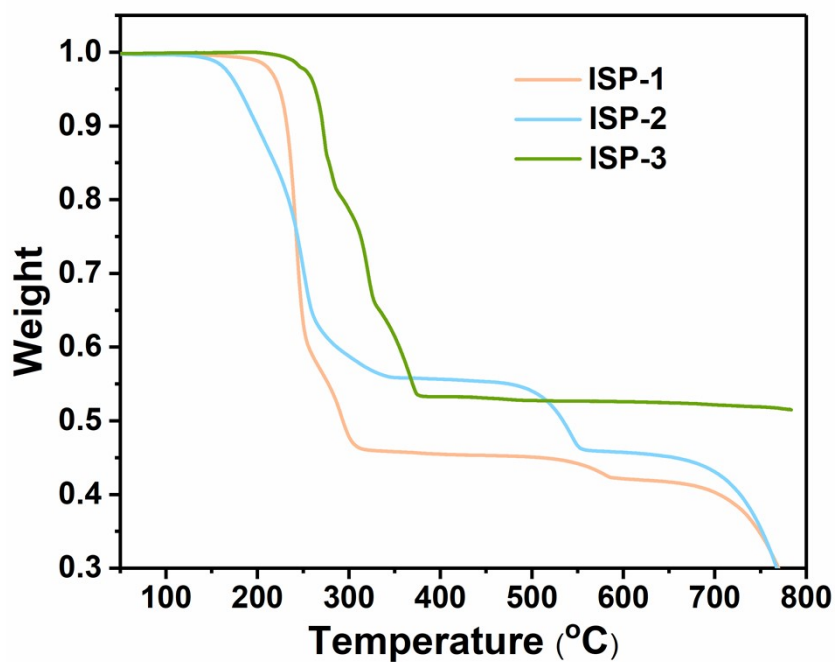

**Fig. S7** TGA curves of **ISP-1**, **ISP-2** and **ISP-3**. An abrupt weight loss between 150-400°C (200°C-300°C for **ISP-1**, 150°C-350°C for **ISP-2**, 250°C-370°C for **ISP-3**) is attributed to the carbonization of template as well as the loss of adsorbed auxiliary solvents. Obviously, the thermostability of **ISP-3** is better than **ISP-1** and **ISP-2**, deduced from TGA curves.

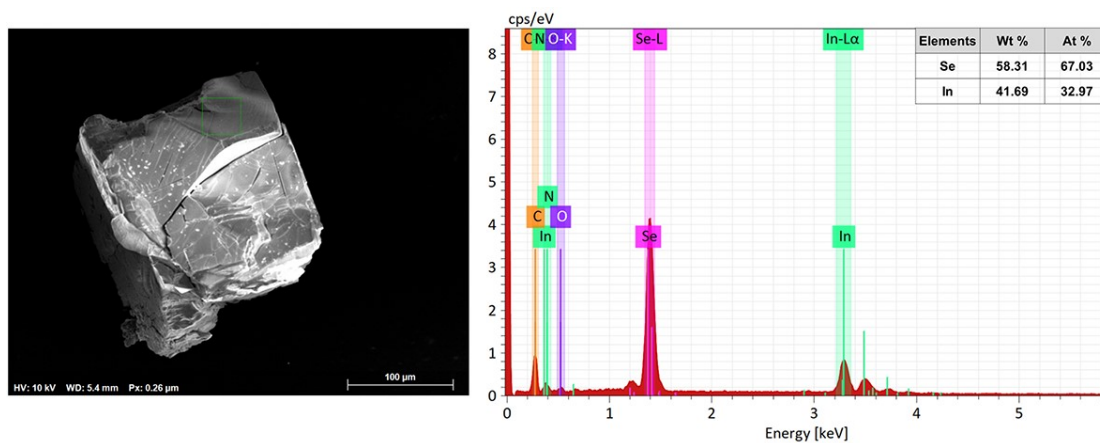

**Fig. S8** SEM image and energy dispersive spectroscopy (EDS) of **ISP-4**.

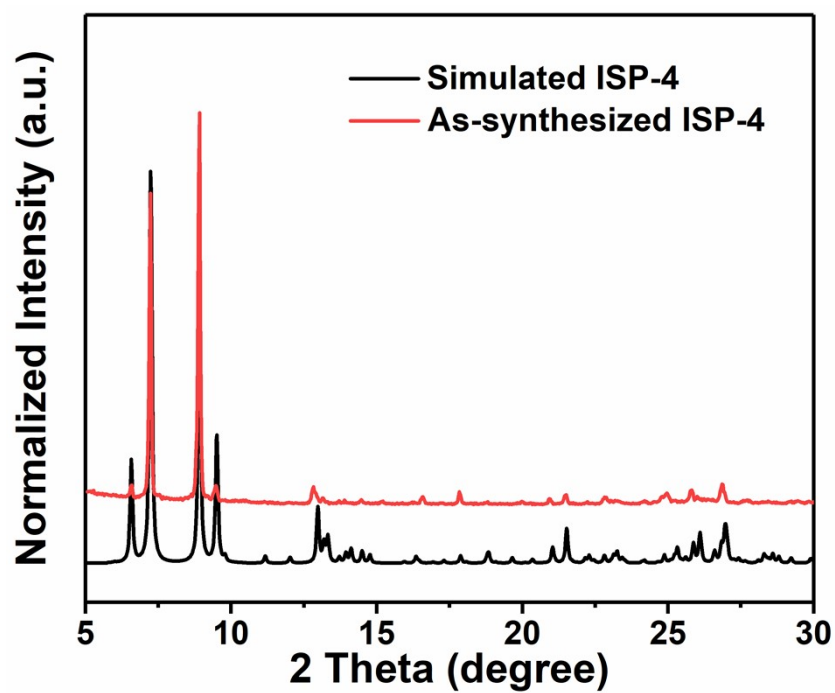

Fig. S9 Powder X-ray diffraction (PXRD) patterns of ISP-4.

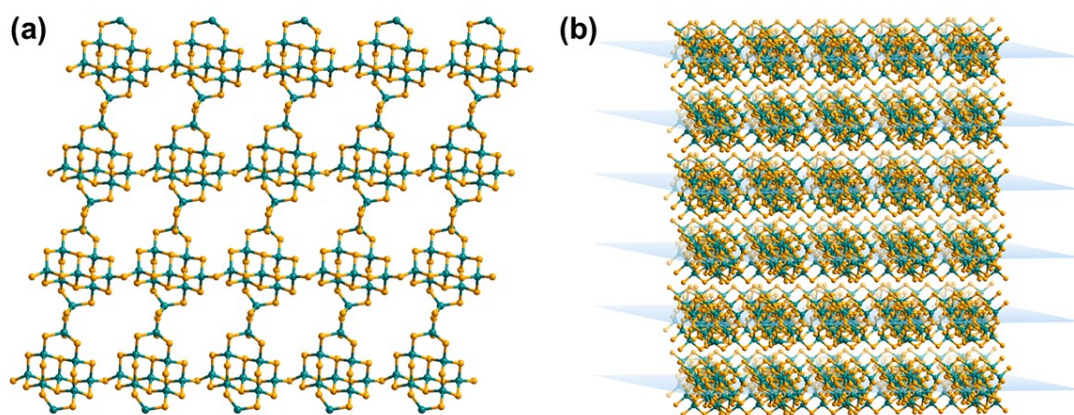

Fig. S10 (a) 2D layered structure of ISP-1 viewed from  $b$ -axis and (b) the stacked structure along with  $b$ -axis.



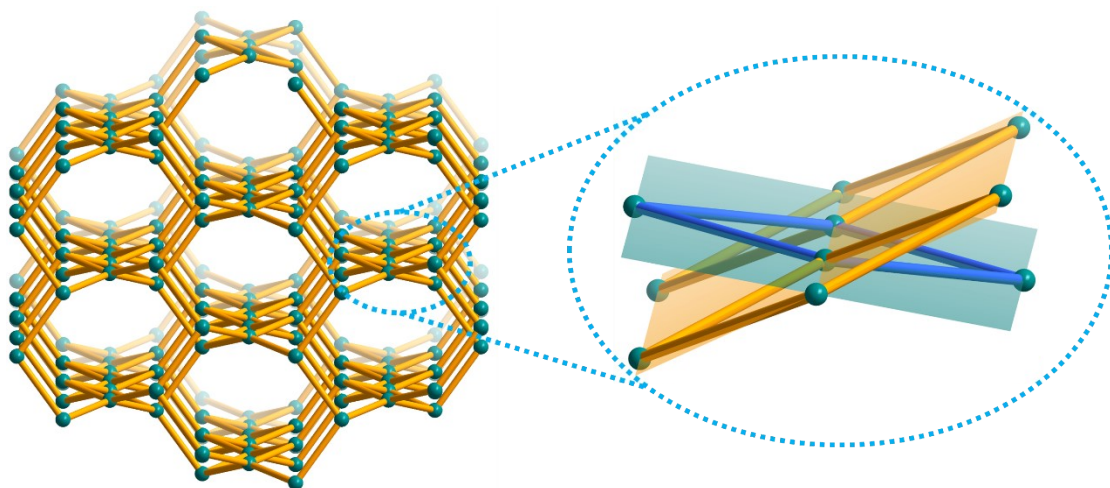

**Fig. S11** Catenulate structures composed by four-membered rings in **ISP-4**.

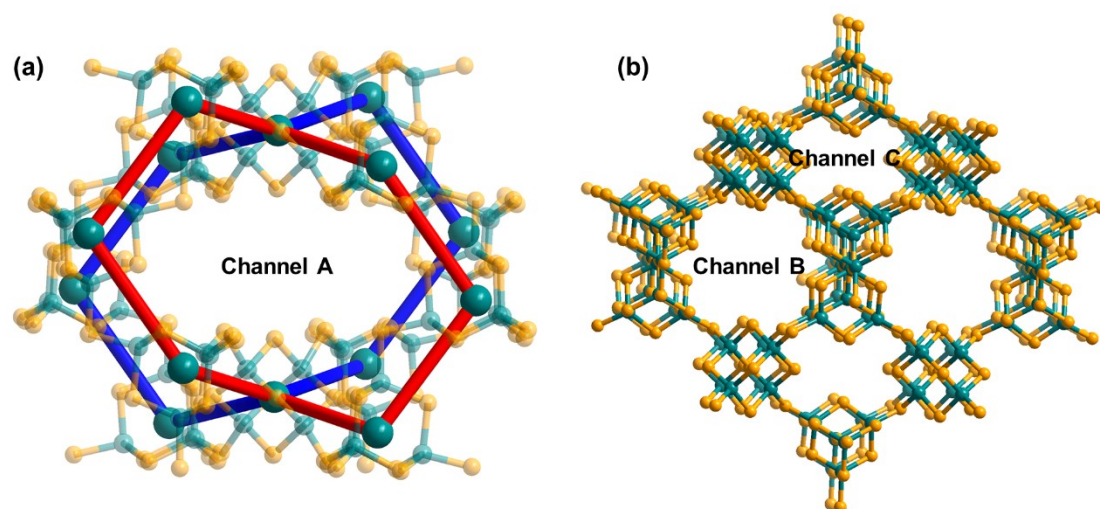

**Fig. S12** (a) Interlaced eight-membered ring constructed Channel A (along with  $a$ -axis) and (b) six-member rings and four-member rings constructed channel B and C (along with  $b$ -axis) in **ISP-4**.

**Table S1.** Crystal data and structure refinement parameters for **ISPs**.

| Compounds                                                                                | ISP-1          | ISP-2          | ISP-3          | ISP-4          |
|------------------------------------------------------------------------------------------|----------------|----------------|----------------|----------------|
| Crystal system                                                                           | Monoclinic     | Monoclinic     | Orthorhombic   | Orthorhombic   |
| Space group                                                                              | P 21/c         | P 21/c         | P b c a        | I b a m        |
| Z                                                                                        | 4              | 2              | 8              | 16             |
| <i>a</i> (Å)                                                                             | 11.949 (15)    | 10.4695 (12)   | 19.6419 (18)   | 29.4109 (11)   |
| <i>b</i> (Å)                                                                             | 23.780 (3)     | 14.4546 (15)   | 19.642 (10)    | 13.3976 (5)    |
| <i>c</i> (Å)                                                                             | 27.236 (3)     | 7.2649 (8)     | 33.131 (17)    | 26.8483 (9)    |
| $\alpha$ (deg.)                                                                          | 90             | 90             | 90             | 90             |
| $\beta$ (deg.)                                                                           | 100.28         | 101.508        | 90             | 90             |
| $\gamma$ (deg.)                                                                          | 90             | 90             | 90             | 90             |
| <i>V</i> (Å <sup>3</sup> )                                                               | 7614.5 (16)    | 1077.3 (2)     | 12782 (9)      | 10579.2 (6)    |
| GOF on <i>F</i> <sup>2</sup>                                                             | 1.059          | 1.055          | 0.987          | 1.183          |
| <i>R</i> <sub>1</sub> , <i>wR</i> <sub>2</sub> ( <i>I</i> > 2σ( <i>I</i> )) <sup>a</sup> | 0.0577, 0.1536 | 0.0919, 0.2261 | 0.0697, 0.1880 | 0.0300, 0.1087 |
| <i>R</i> <sub>1</sub> , <i>wR</i> <sub>2</sub> (all data)                                | 0.0858, 0.1761 | 0.1189, 0.2482 | 0.1421, 0.2265 | 0.0399, 0.1254 |

Note: <sup>a</sup>  $R_1 = \sum ||F_o| - |F_c|| / \sum |F_o|$ ,  $wR_2 = [\sum w(F_o^2 - F_c^2)^2 / \sum w(F_o^2)]^{1/2}$



**Table S2.** Elemental analysis results of **ISPs**.

| <b>Elements (wt.)</b>         | <b>N (%)</b> | <b>C (%)</b> | <b>H (%)</b> |
|-------------------------------|--------------|--------------|--------------|
| Calculated for <b>ISP-1</b>   | 3.21         | 13.75        | 2.77         |
| Experimental for <b>ISP-1</b> | 3.48         | 14.33        | 3.31         |
| Calculated for <b>ISP-2</b>   | 3.20         | 13.72        | 2.76         |
| Experimental for <b>ISP-2</b> | 3.15         | 13.26        | 3.34         |
| Calculated for <b>ISP-3</b>   | 2.72         | 11.67        | 2.35         |
| Experimental for <b>ISP-3</b> | 2.64         | 12.05        | 2.57         |

**Alert level B for crystallographic data of ISP-1 and ISP-2**

PLAT097\_ALERT\_2\_B Large Reported Max. (Positive) Residual Density 7.34 eA-3

DIFMN02\_ALERT\_2\_B The minimum difference density is  $< -0.1 * ZMAX * 1.00$

\_refine\_diff\_density\_min given = -5.111

Test value = -4.900

PLAT098\_ALERT\_2\_B Large Reported Min. (Negative) Residual Density -5.11 eA-3

**Response:** Both Se and In atoms are heavy atoms and it is common for the large peaks appearing on the side of these heavy atoms. The large peaks near In and Se in ISP-1 and ISP-2 are derived from Fourier truncation error of heavy atom, resulting in Alert level B in checkcif.
